# Supplementary material for: Interaction between early-life pet exposure and methylation pattern of ADAM33 on allergic rhinitis among children aged 3–6 years in China
Source: Allergy Asthma Clin Immunol. 2021 May 1;17:44. doi: 10.1186/s13223-021-00526-5 (PMC8088023; doi:10.1186/s13223-021-00526-5)
Supplement: Supplementary file 1 — Additional file 1: Table S1. Description of data: twenty-five AR genes retrieved from Phenopedia database and references to the original publication reporting their association to AR. [file 13223_2021_526_MOESM1_ESM.xlsx]

## Sheet: sheet1
Table S1:Twenty-five AR genes retrieved from Phenopedia database and references to the original publication reporting their association to AR
Associated Gene	Submit Total Publication	Meta-analysis Publication	References	Notes
IL13	11	1	Shazia M, Kanza M, Mehwish I, Irum S, Farida A, Asifa A. IL-13 gene polymorphisms and their association with atopic asthma and rhinitis in Pakistani patients. Iran J Allergy Asthma Immunol. 2013 Aug 28;12(4):391-6. PMID: 23996716.
TNF	6	0	Fuertes E, Brauer M, MacIntyre E, Bauer M, Bellander T, von Berg A, Berdel D, Brunekreef B, Chan-Yeung M, Gehring U, Herbarth O, Hoffmann B, Kerkhof M, Klümper C, Koletzko S, Kozyrskyj A, Kull I, Heinrich J, Melén E, Pershagen G, Postma D, Tiesler CM, Carlsten C; TAG Study Group. Childhood allergic rhinitis, traffic-related air pollution, and variability in the GSTP1, TNF, TLR2, and TLR4 genes: r…	without CpG islands
IL4	6	1	Li Y, Mu Z, Wang H, Liu J, Jiang F. The role of particulate matters on methylation of IFN-γ and IL-4 promoter genes in pediatric allergic rhinitis. Oncotarget. 2018 Apr;9(25):17406-17419. DOI: 10.18632/oncotarget.24227.
CD14	6	0	Leynaert B, Guilloud-Bataille M, Soussan D, Benessiano J, Guénégou A, Pin I, Neukirch F. Association between farm exposure and atopy, according to the CD14 C-159T polymorphism. J Allergy Clin Immunol. 2006 Sep;118(3):658-65. doi: 10.1016/j.jaci.2006.06.015. Epub 2006 Jul 28. PMID: 16950285.
IL18	5	0	Birbian N, Singh J, Jindal SK. Protective role of IL-18 -137G/C polymorphism in a North Indian population with asthma: a pilot study. Cytokine. 2013 Jan;61(1):188-93. doi: 10.1016/j.cyto.2012.09.015. Epub 2012 Oct 22. PMID: 23085113.	without CpG islands
FOXP3	4	0	Xiang R, Liu Y, Xu Y. [Effect of the FOXP3 gene methylation status in pathogenesis of patients with allergic rhinitis]. Lin Chung Er Bi Yan Hou Tou Jing Wai Ke Za Zhi. 2016 May 5;30(9):707-711. Chinese. doi: 10.13201/j.issn.1001-1781.2016.09.009. PMID: 29771018.	gene on X-chromosome
TGFB1	4	0	Kim SH, Yang EM, Lee HN, Cho BY, Ye YM, Park HS. Combined effect of IL-10 and TGF-beta1 promoter polymorphisms as a risk factor for aspirin-intolerant asthma and rhinosinusitis. Allergy. 2009 Aug;64(8):1221-5. doi: 10.1111/j.1398-9995.2009.01989.x. Epub 2009 Feb 16. PMID: 19222424.
TLR2	4	0	Fuertes E, Brauer M, MacIntyre E, Bauer M, Bellander T, von Berg A, Berdel D, Brunekreef B, Chan-Yeung M, Gehring U, Herbarth O, Hoffmann B, Kerkhof M, Klümper C, Koletzko S, Kozyrskyj A, Kull I, Heinrich J, Melén E, Pershagen G, Postma D, Tiesler CM, Carlsten C; TAG Study Group. Childhood allergic rhinitis, traffic-related air pollution, and variability in the GSTP1, TNF, TLR2, and TLR4 genes: r…
TLR4	4	0	Kang I, Oh YK, Lee SH, Jung HM, Chae SC, Lee JH. Identification of polymorphisms in the Toll-like receptor gene and the association with allergic rhinitis. Eur Arch Otorhinolaryngol. 2010 Mar;267(3):385-9. doi: 10.1007/s00405-009-1100-y. Epub 2009 Sep 18. PMID: 19763595.	without CpG islands
TAP1	3	0	Qingyong C . Relationship between rs1057141 and rs1135216 polymorphisms of TAP1 gene and allergic rhinitis in Xinjiang Han people[J]. Journal of Clinical Otorhinolaryngology Head and Neck Surgery, 2012, 26(20):917-920.
ADAM33	3	0	Zihlif M, Mahafza T, Obeidat NM, Froukh T, Shaban M, Al-Akhras FM, Zihlif N, Naffa R. Frequency of genetic polymorphisms of ADAM33 and their association with allergic rhinitis among Jordanians. Gene. 2013 Dec 1;531(2):462-6. doi: 10.1016/j.gene.2013.08.085. Epub 2013 Sep 10. PMID: 24035932.
IL4R	3	0	Kim JJ, Min JY, Lee JH. Polymorphisms in the IL-13 and IL-4 receptor alpha genes and allergic rhinitis. Eur Arch Otorhinolaryngol. 2007 Apr;264(4):395-9. doi: 10.1007/s00405-006-0204-x. Epub 2006 Nov 8. PMID: 17091279.
ACE	3	0	Lue KH, Ku MS, Li C, Sun HL, Lee HS, Chou MC. ACE gene polymorphism might disclose why some Taiwanese children with allergic rhinitis develop asthma symptoms but others do not. Pediatr Allergy Immunol. 2006 Nov;17(7):508-13. doi: 10.1111/j.1399-3038.2006.00452.x. PMID: 17014625.
GSTP1	3	0	Nickel R, Haider A, Sengler C, Lau S, Niggemann B, Deichmann KA, Wahn U, Heinzmann A; MAS-Study Group. Association study of Glutathione S-transferase P1 (GSTP1) with asthma and bronchial hyper-responsiveness in two German pediatric populations. Pediatr Allergy Immunol. 2005 Sep;16(6):539-41. doi: 10.1111/j.1399-3038.2005.00307.x. PMID: 16176403.
GSTT1	2	0	Birbian N, Singh J, Jindal SK, Joshi A, Batra N, Singla N. GSTT1 and GSTM1 gene polymorphisms as major risk factors for asthma in a North Indian population. Lung. 2012 Oct;190(5):505-12. doi: 10.1007/s00408-012-9385-9. Epub 2012 Apr 7. PMID: 22484660.
IL1A	2	0	Nasiri R, Amirzargar AA, Movahedi M, Hirbod-Mobarakeh A, Farhadi E, Behniafard N, Tavakkol M, Ansaripour B, Moradi B, Zare A, Rezaei N. Single-nucleotide polymorphisms of TNFA and IL1 in allergic rhinitis. J Investig Allergol Clin Immunol. 2013;23(7):455-61. PMID: 24654309.	without CpG islands
IL1B	2	0	Joki-Erkkilä VP, Karjalainen J, Hulkkonen J, Pessi T, Nieminen MM, Aromaa A, Klaukka T, Hurme M. Allergic rhinitis and polymorphisms of the interleukin 1 gene complex. Ann Allergy Asthma Immunol. 2003 Sep;91(3):275-9. doi: 10.1016/S1081-1206(10)63530-2. PMID: 14533660.	without CpG islands
IL1RN	2	0	Nasiri R, Amirzargar AA, Movahedi M, Hirbod-Mobarakeh A, Farhadi E, Behniafard N, Tavakkol M, Ansaripour B, Moradi B, Zare A, Rezaei N. Single-nucleotide polymorphisms of TNFA and IL1 in allergic rhinitis. J Investig Allergol Clin Immunol. 2013;23(7):455-61. PMID: 24654309.	without CpG islands
FCER1A	2	0	ZHANG Y, ZHAO YM, DUAN S, ZHAO LP, ZHANG L. [Association analysis between single-nucleotide polymorphisms in the FCER1A gene and serum total IgE level in patients with allergic rhinitis]. Zhonghua Er Bi Yan Hou Tou Jing Wai Ke Za Zhi. 2012 Apr;47(4):289-93. Chinese. PMID: 22800345.	without CpG islands
KCNE4	2	0	Freĭdin MB, Bragina EIu, Saltykova IV, Deeva EV, Ogorodova LM, Puzyrev VP. [Effect of additional disease (comorbidity) on association of allergic rhinitis with KCNE4 gene rs12621643 variant]. Genetika. 2013 Apr;49(4):541-4. Russian. doi: 10.7868/s001667581304005x. PMID: 23866632.
GATA3	2	0	Wang XD, Zhang L, Duan H, She WY, Zhao Y, Liu S, Han DM. [Association of single nucleotide polymorphisms of GATA3 with allergic rhinitis phenotypes in Chinese]. Zhonghua Er Bi Yan Hou Tou Jing Wai Ke Za Zhi. 2008 Jul;43(7):494-8. Chinese. PMID: 18826115.
ADRB2	2	0	Cichy M, Adamek-Guzik T, Uracz D, Uracz W, Czerniawska-Mysik G, Korbut R, Guzik TJ. Znaczenie czynnosciowe polimorfizmów Arg16Gly oraz Gln27Glu receptora beta2-adrenergicznego u chorych na astme oskrzelowa i alergiczny niezyt nosa [The functional relevance of Arg16Gly and Gln27Glu-beta2-adrenoreceptor polymorphism in patients with asthma and allergic rhinitis]. Folia Med Cracov. 2005;46(1-2):33-5…
HAVCR2	2	0	Chae SC, Park YR, Lee YC, Lee JH, Chung HT. The association of TIM-3 gene polymorphism with atopic disease in Korean population. Hum Immunol. 2004 Dec;65(12):1427-31. doi: 10.1016/j.humimm.2004.07.002. PMID: 15603868.
TAP2	2	0	Takeuchi K, Abe S, Masuda S, Yuta A, Majima Y, Sakakura Y. Lack of association between gene polymorphism of transporters associated with antigen processing and allergic rhinitis in a Japanese population. Ann Otol Rhinol Laryngol. 2002 May;111(5 Pt 1):460-3. doi: 10.1177/000348940211100512. PMID: 12018331.
GSTM1	2	0	Wang X, Li W, Liu W, Cai B, Cheng T, Gao C, Mo L, Yang H, Chang L. GSTM1 and GSTT1 gene polymorphisms as major risk factors for bronchopulmonary dysplasia in a Chinese Han population. Gene. 2014 Jan 1;533(1):48-51. doi: 10.1016/j.gene.2013.10.004. Epub 2013 Oct 10. PMID: 24120392.
